1 **Epidemiology of *Staphylococcus aureus* in Neonates on Admission to a**  
2 **Chinese Neonatal Intensive Care Unit**

3

4 Wenjing Geng<sup>1\*</sup>, Yujie Qi<sup>1</sup>, Wenting Li<sup>2</sup>, Thomas H. McConville<sup>3</sup>, Alexandra Hill-Ricciuti<sup>4</sup>,  
5 Emily Grohs<sup>4</sup>, Lisa Saiman<sup>4,5</sup>, Anne-Catrin Uhlemann<sup>3</sup>

6

7 <sup>1</sup> Neonatal Center, Beijing Children's Hospital, Capital Medical University, National Center for  
8 Children's Health, Beijing, China

9 <sup>2</sup> Respiratory Department, Qilu Children's Hospital of Shandong University, Jinan, China

10 <sup>3</sup> Department of Medicine, Division of Infectious Diseases, Columbia University Medical Center,  
11 New York, NY, USA

12 <sup>4</sup> Department of Pediatrics, Columbia University Irving Medical Center, New York, NY, USA

13 <sup>5</sup> Department of Infection Prevention and Control, New York-Presbyterian Hospital, New York,  
14 NY, USA

15

16 \*Corresponding author:

17

18 E-mail: [wenjingsmart@163.com](mailto:wenjingsmart@163.com)(WG)

19

20

21

22

## 24 ABSTRACT

25 **Purpose:** Little is known about the molecular epidemiology of *Staphylococcus aureus* in  
26 Chinese neonatal intensive care units (NICUs). We describe the molecular epidemiology of *S.*  
27 *aureus* isolated from neonates on admission to Beijing Children's Hospital.

28  
29 **Methods:** From May 2015-March 2016, nasal swabs were obtained on admission from 536  
30 neonates. Cultures were also obtained from body sites with suspected infections. *S. aureus*  
31 isolates were characterized by staphylococcal chromosomal cassette (SCCmec) type,  
32 staphylococcal protein A (*spa*) type, multilocus sequence type (MLST), *sasX* gene, antimicrobial  
33 susceptibility and cytotoxicity. Logistic regression assessed risk factors for colonization.

34  
35 **Results:** Overall, 92 (18%) infants were colonized with *S. aureus* and 23 (4%) were diagnosed  
36 with culture-positive *S. aureus* infection. Of the colonized infants, 72% harbored MSSA, while  
37 74% of infected infants were culture-positive for MRSA. Risk factors for colonization included  
38 female sex, age 7-28 days, birthweight and vaginal delivery. The most common MRSA and  
39 MSSA clones were community-associated ST59-SCCmecIVa-t437 (60%) and ST188-t189  
40 (15%), respectively. The *sasX* gene was not detected. Some MSSA isolates (16%) were  
41 penicillin-susceptible and some MRSA isolates (18%) were oxacillin-susceptible. MRSA and  
42 MSSA had similar cytotoxicity, but colonizing strains were less cytotoxic than strains associated  
43 with infections.

44  
45 **Conclusions:** *S. aureus* colonization was common in infants admitted to our NICU and two  
46 community-associated clones predominated. Several non-modifiable risk factors for *S. aureus*

47 colonization were identified. These results suggest that screening infants for *S. aureus* upon  
48 admission and targeting decolonization of high-risk infants and/or those colonized with high-risk  
49 clones could be useful to prevent transmission.

50

51 **Key words:** *Staphylococcus aureus*, neonatal intensive care unit, colonization, MRSA, MSSA

52

## 53 INTRODUCTION

54 *Staphylococcus aureus* infections represent a significant clinical burden for infants worldwide  
55 and were recently found to be the second most common cause of late-onset sepsis in very-low  
56 birth weight (VLBW) infants admitted to neonatal intensive care units (NICU) in the United  
57 States and United Kingdom.[1, 2] Preterm infants are also at high risk for *S. aureus*  
58 colonization[3], a potential risk factor for subsequent infection. In a recent meta-analysis  
59 involving patients admitted to NICUs and ICUs, methicillin-resistant *S. aureus* (MRSA)  
60 colonization was associated with a 24.2 times increased MRSA infection risk.[4] Endemic  
61 transmission and outbreaks due to MRSA and methicillin-susceptible *S. aureus* (MSSA) occur  
62 frequently in NICUs.[5] Studying the molecular epidemiology and virulence factors of *S. aureus*  
63 in the NICU population can promote an increased understanding of pathogenesis and ultimately  
64 guide preventive strategies.

65  
66 While the molecular characteristics of and risk factors for *S. aureus* colonization and infection  
67 have been described for NICU populations across the globe and have increased our knowledge of  
68 the global burden,[3, 6] no previous reports have described the molecular characteristics of *S.*  
69 *aureus* strains isolated from neonates in NICUs in Mainland China. Many tertiary NICUs in  
70 China are part of dedicated hospitals for children; neonates (less than 28 days old) served by  
71 these units are mostly admitted from home after presenting as outpatients. Moreover, the  
72 structural layout, patient population, and visiting policies for parents/guardians may differ  
73 substantially from NICUs in other countries. For example, in the NICU of Beijing Children's  
74 Hospital (BCH), parents are not allowed to visit and rooms contain four to eight neonates. In this  
75 study, we aimed to determine the proportion of neonates colonized and/or infected with MSSA

76 and MRSA on admission to the NICU of BCH, as well as assess risk factors for *S. aureus*  
77 colonization. We further aimed to describe the molecular epidemiology of both MSSA and  
78 MRSA, including the most dominant clones, and their *in vitro* cytotoxicity. Ultimately, we will  
79 use these data to inform future surveillance and *S. aureus* prevention efforts.

80

## 81 **METHODS**

### 82 **Study design, study population, and site**

83 From May 2015 to March 2016, we performed a prospective surveillance study on admission for  
84 MSSA and MRSA among neonates  $\leq 28$  days of age hospitalized in the level 3, 50-bed NICU of  
85 BCH. This hospital does not have an obstetrics unit; therefore, neonates (~700-750 annually) are  
86 admitted to the NICU from home or other obstetric units. The most common admitting diagnoses  
87 are infectious diseases (~60%), prematurity (~20%), and various congenital comorbidities  
88 including cardiac, gastrointestinal, and neurologic disorders (~15%). The Ethics Committee of  
89 BCH, affiliated with Capital Medical University, approved this study; parents and/or legal  
90 guardians of infants provided written informed consent.

91

### 92 **Demographic and clinical data collection**

93 Selected demographic (e.g., sex, age, delivery type, birthweight) and clinical characteristics (e.g.,  
94 congenital disease, respiratory support and previous antibiotic use) were abstracted from the  
95 electronic medical records of enrolled neonates. Age was dichotomized as  $< 7$  days and 7-28 days  
96 of life for analysis, which was consistent with the way neonates have been previously defined[7]  
97 [8]. Antibiotic exposure was defined as use of intravenous or oral antibiotics within the seven  
98 days prior to admission. Respiratory support was defined as the use of nasal continuous positive  
99 airway pressure (NCPAP) or mechanical ventilation within 24 hours of admission. Additionally,

100 diagnoses of suspected infections as described in the NICU admission notes, were also  
101 abstracted.

102

### 103 **Surveillance and clinical specimen collection**

104 To detect *S. aureus* colonization, both anterior nares were swabbed within 24 hours of  
105 admission, following a standard operational procedure. BBL™ Culture Swab™ Collection and  
106 Transport System (Made by Copan for Becton, Dickinson, and Company, Sparks, USA) was  
107 used. Specifically, only one swab was used for both nares. The swab should be inserted in the  
108 nasal vestibule, introducing only the cotton part of the swab. The operator should rotate the swab  
109 while circulating in the nasal vestibule for approximately 5 seconds. This procedure had to be  
110 repeated in both nares.

111

112 Infants showing suggestive clinical symptoms were considered infected if *S. aureus* was isolated  
113 from either a normally sterile site (eg, blood) or cultures obtained for clinical purposes (eg, skin  
114 or eyes). The Clinical Microbiology Laboratory at BCH processed both surveillance and clinical  
115 specimens. *S. aureus* was identified based on colony morphology and the coagulase test  
116 (Saibaisheng, Beijing, China). PCR was used to detect the *mecA* gene.[9] Isolates with zone  
117 sizes less than 21 mm for cefoxitin discs (Sigma, USA), according to the criteria of Clinical and  
118 Laboratory Standards Institute (CLSI),[10] and which were also *mecA* gene positive were  
119 considered MRSA. All *S. aureus* isolates were stored at -20° C.

120

### 121 **Molecular-typing and *sasX* detection**

122 To perform molecular studies, isolates were cultured by the research team on blood agar and  
123 incubated overnight at 37°C. DNA was extracted and used to perform staphylococcal cassette

124 chromosome *mec* (*SCCmec*) typing,[11] multi-locus sequence typing (MLST)[12], and  
125 staphylococcal protein A (*spa*) typing.[13] The *spa* types were assigned using the Ridom Staph  
126 Database (Ridom, Germany).[13] Sequence types (STs) were assigned using the MLST database  
127 (<http://saureus.mlst.net>).[14] Additionally, PCR was used to detect the presence of *sasX*, which  
128 encodes for the cell wall-anchored protein-encoding gene.[15]

129

### 130 **Cytotoxicity assays**

131 Bacteriologically sterile culture filtrate preparations, obtained from early logarithmic-phase  
132 growth (6 hours of incubation), were used for differentiating cytotoxic activity, as described  
133 previously.[16] In brief, isolates were grown in 96-well, round bottomed plates in tryptic soy  
134 broth for 16-18 hours with shaking at 37 °C. Cultures were diluted 1:75 with fresh Roswell Park  
135 Memorial Institute plus casamino acids, and 150 µL of the diluted culture was regrown in 96-  
136 well, round-bottomed plates for 6 hours at 37°C. Plates were centrifuged to pellet the bacteria,  
137 and culture supernatants were collected and stored at –80°C until used. We then assayed the  
138 cytotoxic activity of the culture supernatants using the human myeloid cell line HL-60,  
139 differentiated into neutrophil-like cells (PMN-HL60), which have been shown to mimic the  
140 sensitivity of human neutrophils to *S. aureus*. Twenty microliters of the *S. aureus* supernatant  
141 were incubated with approximately  $1.0 \times 10^5$  PMN-HL60 cells in a final volume of 100 µL (20%  
142 v/v supernatants) for 2 hours at 37°C, followed by 2-hour incubation with the CellTiter reagent,  
143 monitoring metabolic activity. Each sample was assayed in triplicate and independently repeated  
144 at least twice. If >10% variation was observed between triplicate samples, the assay was  
145 repeated.

146

### 147 **Antimicrobial susceptibility testing**

148 Antimicrobial susceptibility was determined by the agar dilution method, in accordance with the  
149 CLSI.[10] MRSA and MSSA isolates were tested for susceptibility to penicillin, oxacillin,  
150 gentamicin, ceftriaxone, rifampin, sulfamethoxazole-trimethoprim (TMP-SMX), erythromycin,  
151 mupirocin, and levofloxacin. MRSA was also tested for susceptibility to vancomycin, linezolid,  
152 fusidic acid, and tigecycline. *S. aureus* ATCC 29213 was used as the quality control.

153

#### 154 **Statistical analysis**

155 The characteristics of colonized and uncolonized neonates were compared using Chi-squared and  
156 Fisher's exact tests, as appropriate. Continuous variables, such as birthweight, were assessed  
157 using Mann Whitney U test.

158

159 Categorical risk factors for *S. aureus* colonization were assessed by comparing the characteristics  
160 of colonized vs. uncolonized neonates. For this analysis, birthweight, in grams, was categorized  
161 into quartiles (e.g., 650-2500, 2501-3199, 3200-3500, 3501-5000 grams). Factors with  $p < 0.10$  in  
162 bivariate analysis were then assessed in a logistic regression model to determine risk factors for  
163 overall *S. aureus* colonization. To determine independent risk factors for MRSA or MSSA  
164 colonization, a multivariate multinomial logistic regression model was used. All statistical tests  
165 were two-sided and performed in SAS 9.4 (Cary, NC); a  $p$ -value  $< 0.05$  was considered  
166 significant.

167

168 Cytotoxicity was expressed as the percentage of cells killed, and the median was compared  
169 among MRSA versus MSSA isolates, isolates associated with infections versus colonization, and  
170 among the most common STs. Cytotoxicity analyses were performed in GraphPad Prism 7.04



171 (GraphPad Software, La Jolla, CA) using the Mann Whitney U test.

172

## 173 **RESULTS**

### 174 **Demographic and clinical characteristics of study population**

175 From May 2015 to March 2016, 536 hospitalized neonates were admitted to the BCH NICU,  
176 most of whom (520/536, 97%) were admitted from home after presenting as outpatients, another  
177 16 neonates were transferred from other obstetric units within 24 hours of birth. All were  
178 swabbed for *S. aureus* nasal colonization on admission. Neonates who were infected with *S.*  
179 *aureus* on admission were excluded from analysis (n=23). Overall, 18% (n=92) of the 513  
180 neonates had nasal colonization with *S. aureus*, 13% (n=66) were colonized with MSSA and  
181 5.1% (n=26) were colonized with MRSA respectively. Colonized infants had a median  
182 chronological age at admission of 14 (IQR [8-22.5]) days. Male and female infants had similar  
183 ages at admission (mean 15 vs. 14 days, respectively, p=0.40). Colonized infants had  
184 significantly higher birthweights (3270 IQR [2020-3655] grams) than uncolonized infants (3100  
185 IQR [2500-3500] grams, p=0.001).

186

187 In this cohort, 255 infants were admitted with suspected infections; of these 23 (9.0%) were  
188 culture-positive for *S. aureus*. Of the 23 *S. aureus* infections, 74% (n=17) were infected with  
189 MRSA and 26% (n=6) were infected with MSSA. Conjunctivitis (n=8, 35%) and omphalitis  
190 (n=8, 35%) were the most commonly diagnosed *S. aureus* infections, followed by pneumonia  
191 (n=3, 13%), impetigo (n=2, 8.7%), cellulitis (n=1, 4.3%), and septicemia (n=1, 4.3%). Four  
192 infected neonates were also colonized (2 with MSSA and 2 with MRSA).

193

194 **Risk factors for MSSA and MRSA colonization**

195 Risk factors for *S. aureus* colonization are shown in Table 1. In the multivariable adjusted  
196 logistic regression model, female sex, age 7-28 days, birthweight and vaginal delivery were  
197 associated with either *S. aureus* colonization, while antibiotic use in the week prior to admission  
198 was protective. An additional adjusted logistic regression model assessing interaction between  
199 birthweight quartiles and neonate age was assessed, but the interaction term was not significant  
200 (p=0.09).

201  
202 In multinomial logistic regression, female sex (p=0.02), vaginal delivery (p<0.0001), and age 7-  
203 28 days (p<0.0001) remained significant risk factors for MSSA colonization, while female sex  
204 (p=0.03) and age 7-28 days (p=0.001) remained significant risk factors for MRSA colonization.  
205 Antibiotic use remained protective for both MSSA and MRSA, while birthweight was  
206 unassociated with either MSSA or MRSA colonization.

207

208

209

210

211

212

213

214

215

216

217

218 **Table 1 Risk Factors for *S. aureus* Colonization in Neonates Admitted to the NICU of Beijing**

219 **Children's Hospital**

| Characteristics                                | Total <sup>1</sup><br>(N=513)<br>N (% of population or subpopulation) | Colonized <sup>1</sup><br>(N=92) | Uncolonized<br>(N=421) | Crude<br>p-value  | OR <sub>ADJ</sub><br>(CI <sub>95</sub> ) <sup>2</sup> | Adj.<br>p-value   |
|------------------------------------------------|-----------------------------------------------------------------------|----------------------------------|------------------------|-------------------|-------------------------------------------------------|-------------------|
| <b>Demographic</b>                             |                                                                       |                                  |                        |                   |                                                       |                   |
| <b>Birthweight<br/>(g)<sup>3</sup></b>         | 3200<br>[2600-3500]                                                   | 3270<br>[3030-3655]              | 3100<br>[2500-3500]    | <b>0.001</b>      | --                                                    | --                |
| <b>Sex</b>                                     |                                                                       |                                  |                        | <b>0.01</b>       | 2.16<br>(1.29, 3.60)                                  | <b>0.0032</b>     |
| Female                                         | 198 (39%)                                                             | 47 (24%)                         | 151 (76%)              |                   |                                                       |                   |
| Male                                           | 315 (61%)                                                             | 45 (14%)                         | 270 (86%)              |                   |                                                       |                   |
| <b>Age (days)</b>                              |                                                                       |                                  |                        | <b>&lt;0.0001</b> | 6.13<br>(3.34, 11.23)                                 | <b>&lt;0.0001</b> |
| <7                                             | 242 (53%)                                                             | 19 (7.9%)                        | 223 (92%)              |                   |                                                       |                   |
| 7-28                                           | 271 (47%)                                                             | 73 (27%)                         | 198 (73%)              |                   |                                                       |                   |
| <b>Delivery type</b>                           |                                                                       |                                  |                        | <b>0.0005</b>     | 2.36<br>(1.40, 3.98)                                  | <b>0.0012</b>     |
| Vaginal                                        | 248 (48%)                                                             | 60 (24%)                         | 188 (76%)              |                   |                                                       |                   |
| Cesarean                                       | 265 (52%)                                                             | 32 (12%)                         | 233 (88%)              |                   |                                                       |                   |
| <b>Clinical</b>                                |                                                                       |                                  |                        |                   |                                                       |                   |
| <b>Congenital<br/>Disease</b>                  |                                                                       |                                  |                        | 0.36              | --                                                    | --                |
| Yes                                            | 86 (17%)                                                              | 12 (14%)                         | 74 (86%)               |                   |                                                       |                   |
| No                                             | 427 (83%)                                                             | 80 (19%)                         | 347 (81%)              |                   |                                                       |                   |
| <b>Antibiotic<br/>Exposure,<br/>prior week</b> |                                                                       |                                  |                        | <b>0.0058</b>     | 0.25<br>(0.14, 0.45)                                  | <b>&lt;0.0001</b> |
| Yes                                            | 188 (37%)                                                             | 22 (12%)                         | 166 (88%)              |                   |                                                       |                   |
| No                                             | 325 (63%)                                                             | 70 (22%)                         | 255 (78%)              |                   |                                                       |                   |
| <b>Respiratory<br/>Support</b>                 |                                                                       |                                  |                        | 0.77              | --                                                    | --                |
| Yes                                            | 96 (19%)                                                              | 16 (17%)                         | 80 (83%)               |                   |                                                       |                   |
| No                                             | 417 (81%)                                                             | 76 (18%)                         | 341 (82%)              |                   |                                                       |                   |

220

221 <sup>1</sup> Excludes 4 neonates who were both colonized and infected on admission

222 <sup>2</sup> Multivariable model adjusted for sex, age, delivery, birthweight (quartiles), and antibiotic use

223 <sup>3</sup> Median [IQR]

224 Abbreviations used: OR<sub>ADJ</sub>=Adjusted Odds Ratio, CI<sub>95</sub>=95% Confidence Interval, [IQR]=

225 Interquartile Range

226

## 227 **Molecular characteristics of *S. aureus* isolates**

228 MLST revealed 16 different sequence types (STs) among the 74 MSSA isolates (Figure 1A), the  
229 most common of which were ST188 (n=12, 16%) and ST5 (n=12, 16%). Twenty-eight MSSA  
230 *spa* types were identified, ST188-t189 (n=11, 15%) was the most common MSSA clone.

231  
232 MLST revealed six different STs among the MRSA isolates (Figure 1B); ST59 was the most  
233 common (n=35, 78%). Nine MRSA *spa* types were identified, SCCmecIVa was the most  
234 common SCCmec type detected (n=32, 71%), followed by SCCmecV (n=6, 13%), SCCmecIVg  
235 (n=5, 11%), and SCCmecIII (n=1, 2.2%); one isolate could not be typed. ST59-SCCmecIVa-  
236 t437 (n=27, 60%) was the most common MRSA clone (Figure 2B).

237  
238 Of 19 *S. aureus* isolates associated with skin and soft tissue infections (SSTIs), 3 (17%)  
239 belonged to ST398. Three of the four neonates who were both colonized and diagnosed with  
240 infection had the same *spa* type, ST, and SCCmec type identified in their isolate pairs; another  
241 one infant had a point mutation in the *tpi* gene representing a different ST. No MSSA or MRSA  
242 isolate harbored *sasX*.

## 243 244 **Antimicrobial susceptibilities**

245 All 74 MSSA isolates were susceptible to oxacillin, rifampin, TMP-SMX, and mupirocin; 99%  
246 (73/74) were also susceptible to levofloxacin, 26% (19/74) to erythromycin and 16% (12/74) to  
247 penicillin. All 45 MRSA isolates were susceptible to rifampin, TMP-SMX, mupirocin,  
248 levofloxacin, vancomycin, linezolid and tigecycline; 98% (44/45) were also susceptible to  
249 gentamicin and fusidic acid (44/45).

250 Eight MRSA isolates (18%) were oxacillin-susceptible (OS-MRSA), five (63%) of these  
251 belonged to ST59-SCCmecIVa-t437.

252

### 253 **Cytotoxicity of MSSA and MRSA and of colonizing and infectious isolates**

254 The median cytotoxicity of the 119 isolates was 85% (IQR [76-88%]). The cytotoxicity of  
255 MRSA (median: 84%, IQR [79-87%]) and of MSSA (median: 86%, IQR [75-88%]) were similar  
256 ( $p=0.85$ ) as shown in Figure 2A. The cytotoxicity of the 96 colonizing *S. aureus* isolates  
257 (median: 85%, IQR [73-87%]) was less than that of the 23 infectious isolates (median: 88%, IQR  
258 [82-88%],  $p=0.0008$ ) (Figure 2B). Of the 3 main *S. aureus* clones, ST398-t571 had significantly  
259 lower cytotoxicity (median: 72%, IQR [64-79%],  $p=0.002$ ) compared to ST188-t159 (median:  
260 85%, IQR [84-88%]) and ST59-t437 (median: 83%, IQR [74-87%]). Additionally, ST398-t571  
261 had significantly lower cytotoxicity when compared to the cytotoxicity of all other clones  
262 (median all other clones: 86% IQR [80-88%],  $p=0.003$ ).

263

## 264 **DISCUSSION**

265 To our knowledge, this is the first study to assess the burden and molecular epidemiology of *S.*  
266 *aureus* in a Chinese NICU. On admission, 18% of neonates  $\leq 28$  days of age had nasal  
267 colonization with MSSA or MRSA. This rate was higher than previously reported for neonates  
268 within 6 days of birth in Japan (10%)[17], neonates within 1 month of birth in the United States  
269 (3.8%),[18] and neonates in a Taiwanese NICU (13%).[19] In the current study, 5.1% of  
270 neonates were colonized with MRSA, which was also a higher rate than previously reported in  
271 other NICUs in which rates ranged from 0.3-4.4%. [17]; [18]; [19] Our higher colonization rate  
272 may reflect the admission patterns into our NICU, as 97% of neonates were admitted from home

273 and others were transferred from other obstetric units within 24 hours of birth. An *S. aureus* case  
274 was considered community acquired if it was isolated from an outpatient or an inpatient within  
275 48 h of hospitalization<sup>14</sup>, so all the *S. aureus* were more likely to have been transferred from the  
276 community. Furthermore, 9% of neonates admitted with suspected infections were culture-  
277 positive for *S. aureus*, 74% (17/23 infections) of which were due to MRSA. This contrasts with  
278 previous reports in which MSSA represented a greater proportion of *S. aureus* infections than  
279 MRSA.[20] Our findings demonstrated that admitted neonates continually imported *S. aureus*  
280 into the NICU, and thus served as potential reservoirs of pathogens for other infants. This  
281 suggests that routine surveillance followed by targeted intervention strategies could be useful in  
282 reducing *S. aureus* infections. However, future studies should assess the effectiveness of  
283 surveillance and decolonization in identifying high-risk infants and/ or targeting highly-cytotoxic  
284 *S. aureus* clones in our NICU.

285  
286 While others have assessed factors associated with *S. aureus* colonization in the NICU  
287 population, including prematurity and intubation, few have examined the effect of age on  
288 colonization risk.[4, 6] We found that neonates aged 7-28 days were at significantly increased  
289 risk for both MRSA and MSSA colonization compared with younger neonates. Similarly,  
290 Macnow et al found that infants transferred to the NICU at 7 days of age or older had  
291 significantly increased odds of colonization with MRSA compared to younger infants,  
292 presumably due to more MRSA exposure through interactions with staff, family members, and  
293 the healthcare environment.[21] We also found that higher birthweight was associated with an  
294 increased risk of *S. aureus* colonization, which contrasts with previous literature[3], we believe  
295 this finding may also be related to the admission patterns of our NICU. In addition, we found  
296 that female sex was a risk factor for both MSSA and MRSA colonization, which differed from

297 previous reports. A meta-analysis of risk factors for MRSA colonization in the NICU showed no  
298 relationship between colonization and sex,[3] while another study reported male neonates were  
299 at increased risk of both MRSA and MSSA colonization.[22] However, our admission patterns  
300 did not elucidate an explanation for this finding nor were female neonates older than male  
301 neonates on admission. We found vaginal delivery to be a risk factor for MSSA, but not for  
302 MRSA colonization. In Shenzhen China, 7.3% vs. 1.7% of pre-partum women were colonized  
303 with MSSA and MRSA, respectively, and vaginal delivery was associated with neonatal MSSA,  
304 but not with MRSA colonization.[22] Similarly, Top et al reported MSSA and MRSA  
305 anovaginal colonization rates of 11.8% and 0.6%, respectively, in pre-partum women, although  
306 neonatal colonization was not assessed.[23] These findings suggest that vertical transmission of  
307 *S. aureus* occurs, but is more relevant for MSSA than MRSA, presumably because fewer women  
308 are colonized with MRSA.

309  
310 In contrast, neonates who had received antibiotics within seven days of admission were at  
311 decreased risk for both MSSA and MRSA colonization. Notably, 188 (37%) neonates had  
312 received antibiotics within seven days of admission, as many infants had suspected infections  
313 managed as outpatients. Oral antibiotics have not been shown to eradicate MRSA colonization in  
314 hospitalized adults.[24] However, the relevance of these studies for neonates in whom the  
315 organism burden may be lower or the duration of colonization is likely shorter is uncertain.  
316 MSSA *spa* and STs were diverse, as noted in previous studies.[25] However, ST188 and ST5  
317 were the most common MSSA clones, consistent with previous reports of community-associated  
318 MSSA among adults and children in China.[26] ST188 virulence has been in part attributed to  
319 epithelial cell adhesion and biofilm formation, properties which could facilitate nasal  
320 colonization.[26] Additionally, an American study indicated that livestock-associated MRSA

321 ST5 isolates can adhere to human keratinocytes, which may facilitate colonization with this  
322 strain.[27] Importation of common community-associated clones with enhanced adherence  
323 properties could potentially facilitate MSSA transmission in the NICU.  
324  
325 ST59-SCC*mecIVa* was the most common MRSA clone, consistent with previous studies of  
326 epidemic MRSA clones across Asia[14] and of community-associated MRSA identified in  
327 Chinese children's hospitals.[28] In this study, several MSSA (n=10) and MRSA (n=2) isolates  
328 belonged to ST398, which was originally reported to colonize livestock and their human  
329 handlers,[29] but has recently been associated with colonization and infection in distinct human  
330 populations in Europe, the Caribbean, and the northeastern United States.[30-32] In China,  
331 ST398 is thought to account for as many as 20% of SSTIs caused by *S. aureus*.[29] Here, we  
332 found that 16% (3/19) of SSTIs caused by *S. aureus* were ST398. As previous studies have  
333 primarily focused on adult patients, the current study may help elucidate the role of ST398 in *S.*  
334 *aureus* infections in the neonatal population.

335  
336 We also explored the presence of the virulence gene *sasX*, which has been implicated in  
337 epidemic spread of MRSA across China and has been demonstrated to play a key role in  
338 colonization and pathogenesis, including promotion of immune evasion.[33] However, *sasX* was  
339 not detected in the current study, potentially because no neonates harbored ST239, the dominant  
340 global healthcare-associated MRSA clone which also predominantly carries *sasX*.[33]

341  
342 Overall, 16% of MSSA strains were penicillin-susceptible. A recent study in Massachusetts  
343 found a 3-fold (13% to 32%) increase in penicillin susceptibility among MSSA bloodstream  
344 isolates over a decade, speculated to be the result of less selective pressure by  $\beta$ -lactam



345 agents.[34] Future studies should address this possibility in China. Additionally, 18% of MRSA  
346 strains were oxacillin-susceptible (OS), which is the first time, to our knowledge, such isolates  
347 have been reported in the neonatal population. OS-MRSA is increasingly associated with animal  
348 and human infections worldwide;[35] 76% of MRSA isolates from bovine mastitis diagnosed in  
349 four Chinese provinces were OS.[36] In our study, ST59-SCCmecIV-t437 was the most common  
350 OS-MRSA clone (63%), which is consistent with a recent study from China which showed that  
351 the most frequent OS-MRSA clones were ST338-t437-SCCmecV (32%) and ST59-t437-  
352 SCCmecIV/V (21%).[37] Likewise, ST59-t437-SCCmecV<sub>T</sub> was the most prevalent OS-MRSA  
353 clone in a study from Taiwan.[38] However, this finding differs from other reports; ST88 and  
354 ST8 were the most prevalent OS-MRSA clones in Africa[39] and OS-MRSA clones were highly  
355 diverse in Brazil,[40] potentially due to geographic differences in genetic background. OS-  
356 MRSA strains may be misidentified as MSSA by traditional susceptibility testing or as MRSA  
357 by molecular detection of *mecA*, thereby complicating the diagnosis and appropriate treatment of  
358 *S. aureus* infections. Surveillance for such emergent strains should thus be a public health  
359 priority.

360  
361 Furthermore we found that cytotoxicity of *S. aureus* was higher in infectious than in colonizing  
362 isolates. This observation differs from a recent report by Maisem et al,[41] who found an  
363 unexpected inverse correlation between *S. aureus* toxicity and disease severity when comparing  
364 colonizing isolates and those isolated from SSTIs or bacteremia in adult patients. They suggested  
365 that bacterial fitness in human serum could explain the unexpected association of low-toxicity  
366 isolates with severe, invasive disease. Similarly, Rose et al[16] reported that low cytotoxic  
367 activity and the CC8/239 clone, a weakly cytotoxic lineage, were independent predictors of

368 mortality in MRSA healthcare-associated pneumonia, suggesting that isolates with low  
369 cytotoxicity may result in a depressed host response and ultimately worse patient outcomes.[16]  
370 We also found that cytotoxicity was linked to the genetic background of *S. aureus*, as ST398-  
371 t571 exhibited significantly lower cytotoxicity than the two most common clones, as well as all  
372 other clones combined. The association between cytotoxicity, clinical presentations, and  
373 outcomes should be studied to further elucidate *S. aureus* pathogenesis. Such studies could also  
374 have important clinical implications and support targeted rather than universal decolonization of  
375 neonates colonized with strains with specific molecular and virulence properties.

376  
377 Several limitations to our study need to be considered. This was a single NICU cohort study with  
378 unique admission patterns, which limits the generalizability of our findings. Since all *S. aureus*  
379 isolates were collected from neonates upon admission, we could not explore hospital  
380 transmission of MSSA or MRSA, nor ascertain whether colonized neonates subsequently  
381 developed infections. Furthermore, given the study design, we could not assess the potential  
382 relationship between cytotoxicity and subsequent infections or clinical outcomes. Because  
383 surveillance cultures were only obtained from the nares of neonates and not from other body  
384 sites, it is possible that we underestimated the true proportion of colonized neonates. We may  
385 have also underestimated infections caused by *S. aureus*, as pre-admission antibiotics could have  
386 resulted in negative clinical cultures.

387  
388 In conclusion, the nasal colonization rate of *S. aureus* in neonates was high in the NICU of BCH.  
389 Female sex, age 7-28 days, birthweight and vaginal delivery were risk factors for colonization.  
390 While MSSA more frequently colonized neonates, MRSA more frequently infected neonates.  
391 Most *S. aureus* strains were community-associated, reflective of NICU admission patterns.

392 Isolates associated with clinical infection exhibited higher cytotoxicity than colonizing isolates.  
393 Our findings suggest that active surveillance of neonates for *S. aureus* should be considered as  
394 part of strategies to detect importation and prevent transmission of both MRSA and MSSA  
395 within the NICU.

396

### 397 **Funding:**

398 This work was supported by the Innovation Fund of Morgan Stanley Global Alliance-Pediatric  
399 Specialties Initiatives and the Beijing Municipal Administration of Hospitals' Youth Programme  
400 (QML20161204). The funders had no role in study design, data collection and interpretation, or  
401 the decision to submit the work for publication.

402

### 403 **Conflict of interest:**

404 The authors have no conflicts of interest to disclose.

405

406

## 407 References

- 408 1. Hornik CP, Fort P, Clark RH, Watt K, Benjamin DK, Jr., Smith PB, et al. Early and late onset sepsis in  
409 very-low-birth-weight infants from a large group of neonatal intensive care units. *Early Hum Dev.* 2012;88  
410 Suppl 2:S69-74.
- 411 2. Cailes B, Kortsalioudaki C, Buttery J, Pattanayak S, Greenough A. Epidemiology of UK neonatal  
412 infections: the neonIN infection surveillance network. 2017. doi: 10.1136/archdischild-2017-313203.
- 413 3. Washam M, Woltmann J, Haberman B, Haslam D, Staat MA. Risk factors for methicillin-resistant  
414 *Staphylococcus aureus* colonization in the neonatal intensive care unit: A systematic review and meta-  
415 analysis. *Am J Infect Control.* 2017;45(12):1388-1393.
- 416 4. Zervou FN, Zacharioudakis IM, Ziakas PD, Mylonakis E. MRSA colonization and risk of infection in  
417 the neonatal and pediatric ICU: a meta-analysis. *Pediatrics.* 2014;133(4):e1015-1023.
- 418 5. Harris SR, Cartwright EJ, Torok ME, Holden MT, Brown NM, Ogilvy-Stuart AL, et al. Whole-genome  
419 sequencing for analysis of an outbreak of methicillin-resistant *Staphylococcus aureus*: a descriptive study.  
420 *Lancet Infect Dis.* 2013;13(2):130-136.
- 421 6. Giuffre M, Amodio E, Bonura C, Geraci DM, Saporito L, Ortolano R, et al. Methicillin-resistant  
422 *Staphylococcus aureus* nasal colonization in a level III neonatal intensive care unit: Incidence and risk  
423 factors. *Am J Infect Control.* 2015;43(5):476-481.
- 424 7. Lehtonen L, Gimeno A, Parra-Llorca A, Vento M. Early neonatal death: A challenge worldwide.  
425 *Seminars in fetal & neonatal medicine.* 2017;22(3):153-160.
- 426 8. Oza S, Lawn JE, Hogan DR, Mathers C, Cousens SN. Neonatal cause-of-death estimates for the  
427 early and late neonatal periods for 194 countries: 2000-2013. *Bulletin of the World Health Organization.*  
428 2015;93(1):19-28.
- 429 9. Bignardi GE, Woodford N, Chapman A, Johnson AP, Speller DC. Detection of the mec-A gene and  
430 phenotypic detection of resistance in *Staphylococcus aureus* isolates with borderline or low-level  
431 methicillin resistance. *J Antimicrob Chemother.* 1996;37(1):53-63.
- 432 10. CLSI. M100-S25 performance standards for antimicrobial susceptibility testing; Twenty-fifth  
433 informational supplement. 2016.
- 434 11. Milheirico C, Oliveira DC, de Lencastre H. Update to the multiplex PCR strategy for assignment of  
435 mec element types in *Staphylococcus aureus*. *Antimicrob Agents Chemother.* 2007;51(9):3374-3377.
- 436 12. Enright MC, Day NP, Davies CE, Peacock SJ, Spratt BG. Multilocus sequence typing for  
437 characterization of methicillin-resistant and methicillin-susceptible clones of *Staphylococcus aureus*.  
438 *Journal of clinical microbiology.* 2000;38(3):1008-1015.
- 439 13. Koreen L, Ramaswamy SV, Graviss EA, Naidich S, Musser JM, Kreiswirth BN. spa typing method for  
440 discriminating among *Staphylococcus aureus* isolates: implications for use of a single marker to detect  
441 genetic micro- and macrovariation. *J Clin Microbiol.* 2004;42(2):792-799.
- 442 14. Geng W, Yang Y, Wu D, Huang G, Wang C, Deng L, et al. Molecular characteristics of community-  
443 acquired, methicillin-resistant *Staphylococcus aureus* isolated from Chinese children. *FEMS Immunol Med*  
444 *Microbiol.* 2010;58(3):356-362.
- 445 15. Kong H, Fang L, Jiang R, Tong J. Distribution of sasX, pvl, and qacA/B genes in epidemic methicillin-  
446 resistant *Staphylococcus aureus* strains isolated from East China. *Infection and drug resistance.*  
447 2018;11:55-59.
- 448 16. Rose HR, Holzman RS, Altman DR, Smyth DS, Wasserman GA, Kafer JM, et al. Cytotoxic Virulence  
449 Predicts Mortality in Nosocomial Pneumonia Due to Methicillin-Resistant *Staphylococcus aureus*. *J Infect*  
450 *Dis.* 2015;211(12):1862-1874.
- 451 17. Mitsuda T, Arai K, Fujita S, Yokota S. Demonstration of mother-to-infant transmission of  
452 *Staphylococcus aureus* by pulsed-field gel electrophoresis. *European journal of pediatrics.*  
453 1996;155(3):194-199.

- 454 18. James L, Gorwitz RJ, Jones RC, Watson JT, Hageman JC, Jernigan DB, et al. Methicillin-resistant  
455 *Staphylococcus aureus* infections among healthy full-term newborns. *Archives of disease in childhood*  
456 *Fetal and neonatal edition*. 2008;93(1):F40-44.
- 457 19. Kuo CY, Huang YC, Huang DT, Chi H, Lu CY, Chang LY, et al. Prevalence and molecular  
458 characterization of *Staphylococcus aureus* colonization among neonatal intensive care units in Taiwan.  
459 *Neonatology*. 2014;105(2):142-148.
- 460 20. Carey AJ, Duchon J, Della-Latta P, Saiman L. The epidemiology of methicillin-susceptible and  
461 methicillin-resistant *Staphylococcus aureus* in a neonatal intensive care unit, 2000-2007. *Journal of*  
462 *perinatology : official journal of the California Perinatal Association*. 2010;30(2):135-139.
- 463 21. Macnow T, O'Toole D, DeLaMora P, Murray M, Rivera K, Whittier S, et al. Utility of surveillance  
464 cultures for antimicrobial resistant organisms in infants transferred to the neonatal intensive care unit.  
465 *The Pediatric infectious disease journal*. 2013;32(12):e443-450.
- 466 22. Lin J, Wu C, Yan C, Ou Q, Lin D, Zhou J, et al. A prospective cohort study of *Staphylococcus aureus*  
467 and methicillin-resistant *Staphylococcus aureus* carriage in neonates: the role of maternal carriage and  
468 phenotypic and molecular characteristics. *Infection and drug resistance*. 2018;11:555-565.
- 469 23. Top KA, Huard RC, Fox Z, Wu F, Whittier S, Della-Latta P, et al. Trends in methicillin-resistant  
470 *Staphylococcus aureus* anovaginal colonization in pregnant women in 2005 versus 2009. *J Clin Microbiol*.  
471 2010;48(10):3675-3680.
- 472 24. Loeb MB, Main C, Eady A, Walker-Dilks C. Antimicrobial drugs for treating methicillin-resistant  
473 *Staphylococcus aureus* colonization. *The Cochrane database of systematic reviews*. 2003;(4):Cd003340.
- 474 25. Asadollahi P, Farahani NN, Mirzaii M, Khoramrooz SS, van Belkum A, Asadollahi K, et al.  
475 Distribution of the Most Prevalent Spa Types among Clinical Isolates of Methicillin-Resistant and -  
476 Susceptible *Staphylococcus aureus* around the World: A Review. *Frontiers in microbiology*. 2018;9:163.
- 477 26. Wang Y, Liu Q. Phylogenetic analysis and virulence determinant of the host-adapted  
478 *Staphylococcus aureus* lineage ST188 in China. 2018;7(1):45.
- 479 27. Hau SJ, Kellner S, Eberle KC, Waack U, Brockmeier SL, Haan JS, et al. Methicillin-Resistant  
480 *Staphylococcus aureus* Sequence Type (ST) 5 Isolates from Health Care and Agricultural Sources Adhere  
481 Equivalently to Human Keratinocytes. *Applied and environmental microbiology*. 2018;84(2):e02073-17.
- 482 28. Li S, Sun J, Zhang J, Li X, Tao X, Wang L, et al. Comparative analysis of the virulence characteristics  
483 of epidemic methicillin-resistant *Staphylococcus aureus* (MRSA) strains isolated from Chinese children:  
484 ST59 MRSA highly expresses core gene-encoded toxin. *APMIS : acta pathologica, microbiologica, et*  
485 *immunologica Scandinavica*. 2014;122(2):101-114.
- 486 29. Witte W, Strommenger B, Stanek C, Cuny C. Methicillin-resistant *Staphylococcus aureus* ST398 in  
487 humans and animals, Central Europe. *Emerging infectious diseases*. 2007;13(2):255-258.
- 488 30. Bhat M, Dumortier C, Taylor BS, Miller M, Vasquez G, Yunen J, et al. *Staphylococcus aureus* ST398,  
489 New York City and Dominican Republic. *Emerging infectious diseases*. 2009;15(2):285-287.
- 490 31. Uhlemann AC, McAdam PR, Sullivan SB, Knox JR, Khiabani H, Rabadan R, et al. Evolutionary  
491 Dynamics of Pandemic Methicillin-Sensitive *Staphylococcus aureus* ST398 and Its International Spread via  
492 Routes of Human Migration. *mBio*. 2017;8(1): e01375-16.
- 493 32. David MZ, Siegel J, Lowy FD, Zychowski D, Taylor A, Lee CJ, et al. Asymptomatic carriage of  
494 sequence type 398, spa type t571 methicillin-susceptible *Staphylococcus aureus* in an urban jail: a newly  
495 emerging, transmissible pathogenic strain. *J Clin Microbiol*. 2013;51(7):2443-2447.
- 496 33. Li M, Du X, Villaruz AE, Diep BA, Wang D, Song Y, et al. MRSA epidemic linked to a quickly spreading  
497 colonization and virulence determinant. *Nat Med*. 2012;18(5):816-819.
- 498 34. Chabot MR, Stefan MS, Friderici J, Schimmel J, Larioza J. Reappearance and treatment of penicillin-  
499 susceptible *Staphylococcus aureus* in a tertiary medical centre. *J Antimicrob Chemother*.  
500 2015;70(12):3353-3356.
- 501 35. Pournaras S, Stathopoulos C, Tsakris A. Oxacillin-susceptible MRSA: could it become a successful

- 502 MRSA type? *Future Microbiol.* 2013;8(11):1365-1367.
- 503 36. Pu W, Su Y, Li J, Li C, Yang Z, Deng H, et al. High incidence of oxacillin-susceptible *mecA*-positive  
504 *Staphylococcus aureus* (OS-MRSA) associated with bovine mastitis in China. *PLoS One.* 2014;9(2):e88134.
- 505 37. Song Y, Cui L, Lv Y, Li Y, Xue F. Characterisation of clinical isolates of oxacillin-susceptible *mecA*-  
506 positive *Staphylococcus aureus* in China from 2009 to 2014. *Journal of global antimicrobial resistance.*  
507 2017;11:1-3.
- 508 38. Ho CM, Lin CY, Ho MW, Lin HC, Chen CJ, Lin LC, et al. Methicillin-resistant *Staphylococcus aureus*  
509 isolates with SCCmec type V and *spa* types t437 or t1081 associated to discordant susceptibility results  
510 between oxacillin and ceftiofur, Central Taiwan. *Diagnostic microbiology and infectious disease.*  
511 2016;86(4):405-411.
- 512 39. Conceicao T, Coelho C, de Lencastre H, Aires-de-Sousa M. Frequent occurrence of oxacillin-  
513 susceptible *mecA*-positive *Staphylococcus aureus* (OS-MRSA) strains in two African countries. *J Antimicrob*  
514 *Chemother.* 2015;70(12):3200-3204.
- 515 40. Andrade-Figueiredo M, Leal-Balbino TC. Clonal diversity and epidemiological characteristics of  
516 *Staphylococcus aureus*: high prevalence of oxacillin-susceptible *mecA*-positive *Staphylococcus aureus*  
517 (OS-MRSA) associated with clinical isolates in Brazil. *BMC microbiology.* 2016;16(1):115.
- 518 41. Laabei M, Uhlemann AC, Lowy FD, Austin ED, Yokoyama M, Ouadi K, et al. Evolutionary Trade-Offs  
519 Underlie the Multi-faceted Virulence of *Staphylococcus aureus*. *PLoS biology.* 2015;13(9):e1002229.
- 520

1 **Figure Legends**

2 **Figure 1A: Distribution of MSSA *spa* types among sequence types (ST) in neonates**  
3 **admitted to the NICU of Beijing Children's Hospital, May 2015-March 2016.**

4 Overall, 16 STs and 29 *spa* types were identified in 74 MSSA isolates. The most common STs  
5 were ST188 (n=12, 16%) and ST398 (n=10, 14%). Abbreviations used in figure: (MSSA,  
6 methicillin-susceptible *Staphylococcus aureus*; MLST, multi-locus sequence typing; ST,  
7 sequence type).

bioRxiv preprint doi: <https://doi.org/10.1101/529941>; this version posted January 24, 2019. The copyright holder for this preprint (which was not certified by peer review) is the author/funder, who has granted bioRxiv a license to display the preprint in perpetuity. It is made available under aCC-BY 4.0 International license.

9 **Figure 1B: Distribution of MRSA *spa* types among sequence types (ST) in neonates**  
10 **admitted to the NICU of Beijing Children's Hospital, May 2015-March 2016.**

11 Overall, 6 STs and 9 *spa*-types were identified in 45 MRSA isolates. The most common ST was  
12 ST59 (n=35, 78%). Abbreviations used in figure: (MSSA, methicillin-susceptible  
13 *Staphylococcus aureus*; MLST, multi-locus sequence typing; ST, sequence type).

14  
15  
16  
17  
18  
19  
20  
21  
22  
23  
24

1 **Figure Legends**

2

3 **Figure 2A: Cytotoxicity of MSSA versus MRSA isolates obtained from neonates at Beijing**

4 **Children's Hospital.**

5 The cytotoxicity of MSSA isolates associated with colonization or infection (n=74) versus

6 MRSA isolates associated with colonization or infection (n=45) was similar (84 vs 86%,

7 p=0.85).

8

bioRxiv preprint doi: <https://doi.org/10.1101/529941>; this version posted January 24, 2019. The copyright holder for this preprint (which was not certified by peer review) is the author/funder, who has granted bioRxiv a license to display the preprint in perpetuity. It is made available under aCC-BY 4.0 International license.

9 **Figure 2B: Cytotoxicity of MSSA and MRSA isolates associated with colonization versus**

10 **infection obtained from neonates at Beijing Children's Hospital.**

11 The cytotoxicity of MRSA and MSSA isolates associated with colonization (n=96) was less

12 than the cytotoxicity of MSSA and MRSA isolates associated with infection (n=23) (p=0.008).

13

14

15

16

17

18

19

20

21

22

23

24
